# Supplementary material
Source: Springer Nature journal article supplement (https://mijn.bsl.nl/resource/supplementary/13047_2013_566_MOESM4_ESM.pdf/7112404)

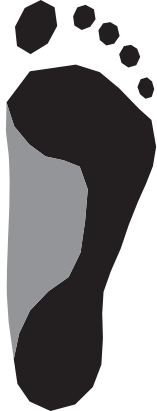

BMI 15

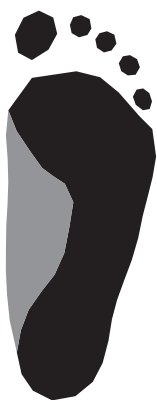

BMI 30

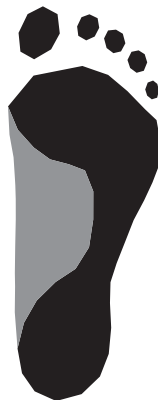

shoe size 33

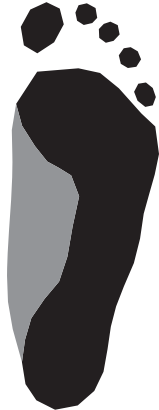

shoe size 44

**a**

**b**

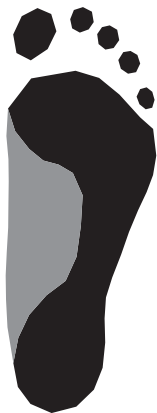

never high heels

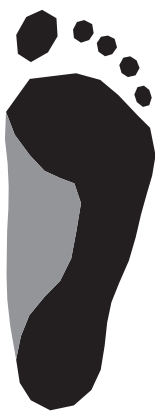

often

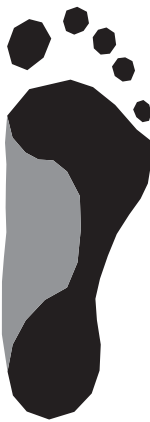

never x 3

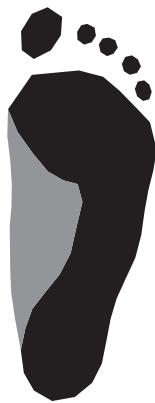

often x 3

**c**

Supplement: MOESM4 [file 7112404]
